# Supplementary material for: Modified Two-Parameter Liu Estimator for Addressing Multicollinearity in the Poisson Regression Model
Source: MDPI journal article supplement (doi:10.3390/axioms13010046), 2024-01-11
Supplement: s1 [file s1]

# Supplementary Materials: Modified Two-Parameter Liu Estimator for Addressing Multicollinearity in the Poisson Regression Model

**Table S1.** Computed MSE for difference estimators  $p = 9$  and  $\beta_0 = -1$ .

| $\rho$ | n   | PMLE     | PRRE        |             |             | PLE         |             | PALE    | PMTPLE              |                     |                     |                     |                     |
|--------|-----|----------|-------------|-------------|-------------|-------------|-------------|---------|---------------------|---------------------|---------------------|---------------------|---------------------|
|        |     |          | $\hat{k}_1$ | $\hat{k}_2$ | $\hat{k}_3$ | $\hat{d}_1$ | $\hat{d}_2$ |         | $\hat{k}_{1,d_0}^*$ | $\hat{k}_{2,d_0}^*$ | $\hat{k}_{3,d_0}^*$ | $\hat{k}_{4,d_0}^*$ | $\hat{k}_{5,d_0}^*$ |
| 0.85   | 50  | 1.40638  | 0.97933     | 1.19416     | 0.69085     | 0.76470     | 0.76434     | 0.74722 | 0.56529             | 0.67138             | <b>0.46719</b>      | 0.48709             | 0.49447             |
|        | 100 | 0.34830  | 0.29417     | 0.32948     | 0.30826     | 0.30082     | 0.30082     | 0.29006 | 0.25675             | 0.28615             | <b>0.22333</b>      | 0.24287             | 0.26862             |
|        | 150 | 0.11831  | 0.11144     | 0.11597     | 0.11518     | 0.11273     | 0.11273     | 0.11126 | 0.10738             | 0.11092             | <b>0.10421</b>      | 0.10598             | 0.10959             |
|        | 200 | 0.10084  | 0.09616     | 0.09926     | 0.09895     | 0.09729     | 0.09729     | 0.09612 | 0.09321             | 0.09594             | <b>0.08848</b>      | 0.09158             | 0.09532             |
|        | 250 | 0.07831  | 0.07617     | 0.07736     | 0.07697     | 0.07616     | 0.07616     | 0.07599 | 0.07441             | 0.07537             | <b>0.07154</b>      | 0.07296             | 0.07478             |
|        | 300 | 0.06873  | 0.06623     | 0.06794     | 0.06779     | 0.06690     | 0.06690     | 0.06622 | 0.06482             | 0.06625             | <b>0.06306</b>      | 0.06424             | 0.06553             |
|        | 400 | 0.03532  | 0.03475     | 0.03515     | 0.03514     | 0.03491     | 0.03491     | 0.03475 | 0.03447             | 0.03478             | <b>0.03445</b>      | <b>0.03445</b>      | 0.03468             |
| 0.90   | 50  | 1.58471  | 1.05294     | 1.33906     | 0.79820     | 0.84814     | 0.84783     | 0.82589 | 0.55437             | 0.72748             | <b>0.44615</b>      | 0.45316             | 0.46372             |
|        | 100 | 0.35895  | 0.29397     | 0.33494     | 0.32595     | 0.30158     | 0.30158     | 0.29007 | 0.24555             | 0.28228             | <b>0.19844</b>      | 0.22243             | 0.25864             |
|        | 150 | 0.16468  | 0.15003     | 0.15943     | 0.15845     | 0.15276     | 0.15276     | 0.14940 | 0.13967             | 0.14823             | <b>0.12380</b>      | 0.13332             | 0.14373             |
|        | 200 | 0.10022  | 0.09471     | 0.09825     | 0.09838     | 0.09591     | 0.09591     | 0.09467 | 0.09079             | 0.09412             | <b>0.08279</b>      | 0.08785             | 0.09247             |
|        | 250 | 0.06256  | 0.06080     | 0.06193     | 0.06202     | 0.06117     | 0.06117     | 0.06079 | 0.05963             | 0.06063             | <b>0.05765</b>      | 0.05889             | 0.06009             |
|        | 300 | 0.05153  | 0.05014     | 0.05103     | 0.05115     | 0.05044     | 0.05044     | 0.05014 | 0.04918             | 0.04999             | <b>0.04707</b>      | 0.04842             | 0.04981             |
|        | 400 | 0.02949  | 0.02897     | 0.02930     | 0.02936     | 0.02909     | 0.02909     | 0.02897 | 0.02864             | 0.02893             | <b>0.02796</b>      | 0.02839             | 0.02885             |
| 0.95   | 50  | 3.62979  | 2.22163     | 2.87790     | 0.96271     | 1.21427     | 1.20079     | 1.18340 | 0.75741             | 0.99331             | 0.64950             | <b>0.61775</b>      | 0.59381             |
|        | 100 | 0.88321  | 0.64728     | 0.79801     | 0.68553     | 0.65037     | 0.65037     | 0.61948 | 0.46387             | 0.58992             | <b>0.38314</b>      | 0.42061             | 0.48117             |
|        | 150 | 0.27391  | 0.24148     | 0.26336     | 0.26172     | 0.24927     | 0.24927     | 0.24054 | 0.21961             | 0.24007             | <b>0.19044</b>      | 0.20944             | 0.22958             |
|        | 200 | 0.22716  | 0.20630     | 0.21982     | 0.21900     | 0.21062     | 0.21062     | 0.20605 | 0.19092             | 0.20392             | <b>0.16185</b>      | 0.18059             | 0.19671             |
|        | 250 | 0.18502  | 0.17076     | 0.18035     | 0.17995     | 0.17456     | 0.17456     | 0.17057 | 0.16102             | 0.17024             | <b>0.14228</b>      | 0.15499             | 0.16560             |
|        | 300 | 0.16121  | 0.15276     | 0.15780     | 0.15726     | 0.15369     | 0.15369     | 0.15250 | 0.14573             | 0.15053             | <b>0.12930</b>      | 0.13931             | 0.14720             |
|        | 400 | 0.07712  | 0.07431     | 0.07623     | 0.07640     | 0.07521     | 0.07521     | 0.07429 | 0.07254             | 0.07438             | <b>0.06843</b>      | 0.07135             | 0.07374             |
| 0.99   | 50  | 17.34145 | 10.27323    | 12.83673    | 1.69958     | 1.95710     | 1.53019     | 1.52997 | 1.06175             | 1.27910             | 1.02594             | <b>0.89986</b>      | 1.09390             |
|        | 100 | 3.92216  | 2.40775     | 3.20440     | 1.30788     | 1.47585     | 1.46369     | 1.45962 | 0.84780             | 1.21807             | 0.78938             | <b>0.71699</b>      | 0.47741             |
|        | 150 | 1.26103  | 0.93728     | 1.12407     | 0.98720     | 0.86387     | 0.86387     | 0.85994 | 0.62314             | 0.77173             | <b>0.48125</b>      | 0.52073             | 0.57708             |
|        | 200 | 1.03235  | 0.81136     | 0.93357     | 0.85251     | 0.75819     | 0.75819     | 0.75758 | 0.58181             | 0.68473             | <b>0.39804</b>      | 0.47586             | 0.54097             |
|        | 250 | 0.87274  | 0.71716     | 0.80328     | 0.75019     | 0.68357     | 0.68357     | 0.68307 | 0.55300             | 0.62856             | <b>0.39699</b>      | 0.46335             | 0.52953             |
|        | 300 | 0.71042  | 0.60189     | 0.66089     | 0.63142     | 0.58168     | 0.58168     | 0.58132 | 0.48709             | 0.54050             | <b>0.34644</b>      | 0.41263             | 0.47311             |
|        | 400 | 0.34354  | 0.31554     | 0.32877     | 0.32617     | 0.30912     | 0.30912     | 0.30911 | 0.28328             | 0.29581             | <b>0.21941</b>      | 0.25023             | 0.27877             |

**Table S2.** Computed MSE for difference estimators  $p = 9$  and  $\beta_0 = 0$ .

| $\rho$ | n   | PMLE    | PRRE        |             |             | PLE         |             | PALE    | PMTPLE              |                     |                     |                     |                     |
|--------|-----|---------|-------------|-------------|-------------|-------------|-------------|---------|---------------------|---------------------|---------------------|---------------------|---------------------|
|        |     |         | $\hat{k}_1$ | $\hat{k}_2$ | $\hat{k}_3$ | $\hat{d}_1$ | $\hat{d}_2$ |         | $\hat{k}_{1,d_0}^*$ | $\hat{k}_{2,d_0}^*$ | $\hat{k}_{3,d_0}^*$ | $\hat{k}_{4,d_0}^*$ | $\hat{k}_{5,d_0}^*$ |
| 0.85   | 50  | 0.49638 | 0.40508     | 0.44046     | 0.44095     | 0.40539     | 0.40539     | 0.40140 | 0.32704             | 0.35930             | <b>0.21131</b>      | 0.23482             | 0.32999             |
|        | 100 | 0.12581 | 0.12006     | 0.12114     | 0.12297     | 0.12028     | 0.12028     | 0.12005 | 0.11471             | 0.11578             | <b>0.08951</b>      | 0.10006             | 0.11512             |
|        | 150 | 0.04370 | 0.04306     | 0.04313     | 0.04349     | 0.04309     | 0.04309     | 0.04306 | 0.04246             | 0.04253             | <b>0.03831</b>      | 0.04041             | 0.04252             |
|        | 200 | 0.03566 | 0.03527     | 0.03530     | 0.03553     | 0.03528     | 0.03528     | 0.03527 | 0.03489             | 0.03493             | <b>0.03211</b>      | 0.03357             | 0.03493             |
|        | 250 | 0.02951 | 0.02924     | 0.02926     | 0.02942     | 0.02925     | 0.02925     | 0.02924 | 0.02898             | 0.02901             | <b>0.02707</b>      | 0.02808             | 0.02900             |
|        | 300 | 0.02560 | 0.02541     | 0.02542     | 0.02554     | 0.02542     | 0.02542     | 0.02541 | 0.02523             | 0.02524             | <b>0.02385</b>      | 0.02458             | 0.02525             |
| 0.90   | 400 | 0.01315 | 0.01309     | 0.01310     | 0.01313     | 0.01309     | 0.01309     | 0.01309 | 0.01304             | 0.01305             | <b>0.01263</b>      | 0.01285             | 0.01305             |
|        | 50  | 0.53776 | 0.43040     | 0.47134     | 0.47514     | 0.42958     | 0.42958     | 0.42621 | 0.33809             | 0.37551             | <b>0.21947</b>      | 0.23305             | 0.34051             |
|        | 100 | 0.12906 | 0.12148     | 0.12291     | 0.12649     | 0.12172     | 0.12172     | 0.12147 | 0.11444             | 0.11586             | <b>0.08493</b>      | 0.09583             | 0.11497             |
|        | 150 | 0.06269 | 0.06107     | 0.06127     | 0.06218     | 0.06112     | 0.06112     | 0.06107 | 0.05953             | 0.05973             | <b>0.05025</b>      | 0.05459             | 0.05966             |
|        | 200 | 0.03715 | 0.03660     | 0.03664     | 0.03700     | 0.03661     | 0.03661     | 0.03660 | 0.03607             | 0.03611             | <b>0.03234</b>      | 0.03421             | 0.03611             |
|        | 250 | 0.02312 | 0.02294     | 0.02295     | 0.02308     | 0.02295     | 0.02295     | 0.02294 | 0.02276             | 0.02277             | <b>0.02138</b>      | 0.02211             | 0.02278             |
| 0.95   | 300 | 0.02002 | 0.01987     | 0.01988     | 0.01999     | 0.01988     | 0.01988     | 0.01987 | 0.01973             | 0.01974             | <b>0.01859</b>      | 0.01919             | 0.01974             |
|        | 400 | 0.01120 | 0.01115     | 0.01115     | 0.01119     | 0.01115     | 0.01115     | 0.01115 | 0.01110             | 0.01110             | <b>0.01072</b>      | 0.01092             | 0.01111             |
|        | 50  | 1.29763 | 0.88965     | 1.07116     | 0.95388     | 0.81473     | 0.81473     | 0.80661 | 0.53180             | 0.67182             | <b>0.37196</b>      | 0.36497             | 0.48560             |
|        | 100 | 0.31131 | 0.27812     | 0.28811     | 0.29508     | 0.27901     | 0.27901     | 0.27805 | 0.24813             | 0.25784             | <b>0.17085</b>      | 0.19261             | 0.25032             |
|        | 150 | 0.09912 | 0.09581     | 0.09630     | 0.09806     | 0.09591     | 0.09591     | 0.09581 | 0.09267             | 0.09316             | <b>0.07549</b>      | 0.08324             | 0.09295             |
|        | 200 | 0.08888 | 0.08650     | 0.08682     | 0.08814     | 0.08657     | 0.08657     | 0.08650 | 0.08423             | 0.08455             | <b>0.07017</b>      | 0.07710             | 0.08442             |
| 0.99   | 250 | 0.06924 | 0.06781     | 0.06798     | 0.06878     | 0.06786     | 0.06786     | 0.06781 | 0.06645             | 0.06662             | <b>0.05752</b>      | 0.06197             | 0.06656             |
|        | 300 | 0.05901 | 0.05802     | 0.05812     | 0.05871     | 0.05806     | 0.05806     | 0.05802 | 0.05707             | 0.05717             | <b>0.05045</b>      | 0.05385             | 0.05715             |
|        | 400 | 0.02824 | 0.02799     | 0.02801     | 0.02818     | 0.02800     | 0.02800     | 0.02799 | 0.02775             | 0.02777             | <b>0.02589</b>      | 0.02688             | 0.02778             |
|        | 50  | 5.94265 | 3.52180     | 4.45377     | 1.53502     | 1.51517     | 1.47641     | 1.47271 | 0.89179             | 1.16290             | 0.78152             | <b>0.67717</b>      | 0.69163             |
|        | 100 | 1.44323 | 0.99055     | 1.20410     | 1.11068     | 0.92137     | 0.92137     | 0.91487 | 0.59889             | 0.76762             | 0.45950             | <b>0.43339</b>      | 0.55995             |
|        | 150 | 0.45869 | 0.39385     | 0.41724     | 0.43662     | 0.39507     | 0.39507     | 0.39325 | 0.33622             | 0.35857             | <b>0.22526</b>      | 0.25217             | 0.33964             |
|        | 200 | 0.39180 | 0.34637     | 0.36123     | 0.37705     | 0.34759     | 0.34759     | 0.34624 | 0.30520             | 0.31967             | <b>0.19485</b>      | 0.23481             | 0.30805             |
|        | 250 | 0.32169 | 0.29223     | 0.30090     | 0.31215     | 0.29313     | 0.29313     | 0.29218 | 0.26521             | 0.27372             | <b>0.18099</b>      | 0.21207             | 0.26720             |
|        | 300 | 0.26358 | 0.24396     | 0.24914     | 0.25749     | 0.24458     | 0.24458     | 0.24393 | 0.22576             | 0.23088             | <b>0.15769</b>      | 0.18587             | 0.22714             |
|        | 400 | 0.12782 | 0.12270     | 0.12354     | 0.12651     | 0.12284     | 0.12284     | 0.12270 | 0.11785             | 0.11868             | <b>0.09232</b>      | 0.10387             | 0.11818             |

**Table S3.** Computed MSE for difference estimators  $p = 9$  and  $\beta_0 = 1$ .

| $\rho$ | n   | PMLE    | PRRE        |             |             | PLE         |             | PALE    | PMTPLE              |                     |                     |                     |                     |
|--------|-----|---------|-------------|-------------|-------------|-------------|-------------|---------|---------------------|---------------------|---------------------|---------------------|---------------------|
|        |     |         | $\hat{k}_1$ | $\hat{k}_2$ | $\hat{k}_3$ | $\hat{d}_1$ | $\hat{d}_2$ |         | $\hat{k}_{1,d_0}^*$ | $\hat{k}_{2,d_0}^*$ | $\hat{k}_{3,d_0}^*$ | $\hat{k}_{4,d_0}^*$ | $\hat{k}_{5,d_0}^*$ |
| 0.85   | 50  | 0.17515 | 0.16792     | 0.17058     | 0.17102     | 0.16534     | 0.16534     | 0.16534 | 0.15866             | 0.16118             | <b>0.13565</b>      | 0.14651             | 0.15719             |
|        | 100 | 0.04551 | 0.04512     | 0.04526     | 0.04533     | 0.04499     | 0.04499     | 0.04499 | 0.04462             | 0.04476             | <b>0.04315</b>      | 0.04392             | 0.04474             |
|        | 150 | 0.01553 | 0.01549     | 0.01550     | 0.01551     | 0.01547     | 0.01547     | 0.01547 | 0.01544             | 0.01545             | <b>0.01534</b>      | 0.01539             | 0.01545             |
|        | 200 | 0.01330 | 0.01327     | 0.01328     | 0.01329     | 0.01326     | 0.01326     | 0.01326 | 0.01324             | 0.01325             | <b>0.01313</b>      | 0.01319             | 0.01324             |
|        | 250 | 0.01078 | 0.01076     | 0.01077     | 0.01077     | 0.01076     | 0.01076     | 0.01076 | 0.01074             | 0.01075             | <b>0.01068</b>      | 0.01071             | 0.01074             |
|        | 300 | 0.00932 | 0.00931     | 0.00931     | 0.00932     | 0.00930     | 0.00930     | 0.00930 | 0.00929             | 0.00930             | <b>0.00926</b>      | 0.00928             | 0.00930             |
| 0.90   | 400 | 0.00496 | 0.00484     | 0.00484     | 0.00475     | 0.00472     | 0.00472     | 0.00472 | 0.00469             | 0.00470             | <b>0.00465</b>      | 0.00467             | 0.00469             |
|        | 50  | 0.19725 | 0.18618     | 0.19053     | 0.19166     | 0.18265     | 0.18265     | 0.18265 | 0.17236             | 0.17651             | <b>0.13988</b>      | 0.15474             | 0.16978             |
|        | 100 | 0.04798 | 0.04730     | 0.04754     | 0.04776     | 0.04707     | 0.04707     | 0.04707 | 0.04641             | 0.04665             | <b>0.04338</b>      | 0.04502             | 0.04628             |
|        | 150 | 0.02327 | 0.02314     | 0.02318     | 0.02323     | 0.02309     | 0.02309     | 0.02309 | 0.02297             | 0.02301             | <b>0.02239</b>      | 0.02271             | 0.02296             |
|        | 200 | 0.01364 | 0.01359     | 0.01361     | 0.01363     | 0.01358     | 0.01358     | 0.01358 | 0.01353             | 0.01355             | <b>0.01331</b>      | 0.01344             | 0.01353             |
|        | 250 | 0.00852 | 0.00851     | 0.00851     | 0.00852     | 0.00850     | 0.00850     | 0.00850 | 0.00849             | 0.00850             | <b>0.00844</b>      | 0.00847             | 0.00849             |
| 0.95   | 300 | 0.00682 | 0.00681     | 0.00682     | 0.00682     | 0.00681     | 0.00681     | 0.00681 | 0.00680             | 0.00680             | <b>0.00676</b>      | 0.00678             | 0.00680             |
|        | 400 | 0.00410 | 0.00409     | 0.00409     | 0.00409     | 0.00409     | 0.00409     | 0.00409 | 0.00409             | 0.00409             | <b>0.00407</b>      | 0.00408             | 0.00409             |
|        | 50  | 0.45629 | 0.40254     | 0.42618     | 0.42659     | 0.38496     | 0.38496     | 0.38496 | 0.33859             | 0.35987             | <b>0.24569</b>      | 0.27960             | 0.32576             |
|        | 100 | 0.11474 | 0.11146     | 0.11271     | 0.11327     | 0.11044     | 0.11044     | 0.11044 | 0.10730             | 0.10851             | <b>0.09501</b>      | 0.10135             | 0.10664             |
|        | 150 | 0.03744 | 0.03714     | 0.03725     | 0.03735     | 0.03704     | 0.03704     | 0.03704 | 0.03675             | 0.03685             | <b>0.03537</b>      | 0.03614             | 0.03672             |
|        | 200 | 0.03086 | 0.03066     | 0.03073     | 0.03080     | 0.03059     | 0.03059     | 0.03059 | 0.03039             | 0.03046             | <b>0.02937</b>      | 0.02995             | 0.03037             |
| 0.99   | 250 | 0.02616 | 0.02603     | 0.02607     | 0.02612     | 0.02598     | 0.02598     | 0.02598 | 0.02586             | 0.02590             | <b>0.02519</b>      | 0.02557             | 0.02583             |
|        | 300 | 0.02171 | 0.02162     | 0.02165     | 0.02168     | 0.02159     | 0.02159     | 0.02159 | 0.02150             | 0.02153             | <b>0.02106</b>      | 0.02131             | 0.02148             |
|        | 400 | 0.01046 | 0.01044     | 0.01045     | 0.01045     | 0.01043     | 0.01043     | 0.01043 | 0.01041             | 0.01042             | <b>0.01030</b>      | 0.01036             | 0.01041             |
|        | 50  | 2.08367 | 1.38384     | 1.73663     | 1.46317     | 1.05414     | 1.05345     | 1.05345 | 0.67473             | 0.88829             | 0.52577             | 0.51716             | <b>0.47840</b>      |
|        | 100 | 0.54592 | 0.47318     | 0.50841     | 0.51188     | 0.45345     | 0.45345     | 0.45345 | 0.39100             | 0.42253             | <b>0.28748</b>      | 0.32453             | 0.37537             |
|        | 150 | 0.16179 | 0.15524     | 0.15778     | 0.15977     | 0.15313     | 0.15313     | 0.15313 | 0.14687             | 0.14934             | <b>0.12409</b>      | 0.13547             | 0.14526             |
|        | 200 | 0.14991 | 0.14500     | 0.14687     | 0.14841     | 0.14336     | 0.14336     | 0.14336 | 0.13860             | 0.14043             | <b>0.11906</b>      | 0.12954             | 0.13730             |
|        | 250 | 0.11560 | 0.11272     | 0.11377     | 0.11471     | 0.11173     | 0.11173     | 0.11173 | 0.10893             | 0.10997             | <b>0.09667</b>      | 0.10329             | 0.10814             |
|        | 300 | 0.09645 | 0.09450     | 0.09520     | 0.09585     | 0.09382     | 0.09382     | 0.09382 | 0.09192             | 0.09260             | <b>0.08306</b>      | 0.08795             | 0.09136             |
|        | 400 | 0.04702 | 0.04651     | 0.04669     | 0.04690     | 0.04635     | 0.04635     | 0.04635 | 0.04584             | 0.04602             | <b>0.04334</b>      | 0.04476             | 0.04572             |

**Table S4.** Computed MSE for difference estimators  $p = 12$  and  $\beta_0 = -1$ .

| $\rho$ | n   | PMLE     | PRRE        |             |             | PLE         |             | PALE    | PMTPLE              |                     |                     |                     |                     |
|--------|-----|----------|-------------|-------------|-------------|-------------|-------------|---------|---------------------|---------------------|---------------------|---------------------|---------------------|
|        |     |          | $\hat{k}_1$ | $\hat{k}_2$ | $\hat{k}_3$ | $\hat{d}_1$ | $\hat{d}_2$ |         | $\hat{k}_{1,d_0}^*$ | $\hat{k}_{2,d_0}^*$ | $\hat{k}_{3,d_0}^*$ | $\hat{k}_{4,d_0}^*$ | $\hat{k}_{5,d_0}^*$ |
| 0.85   | 50  | 2.02759  | 1.38480     | 1.69617     | 0.80290     | 0.95200     | 0.95086     | 0.93284 | 0.68493             | 0.82906             | <b>0.55041</b>      | 0.55958             | 0.61994             |
|        | 100 | 0.44817  | 0.37000     | 0.42041     | 0.38837     | 0.37642     | 0.37642     | 0.36255 | 0.31231             | 0.35493             | <b>0.24899</b>      | 0.27305             | 0.32249             |
|        | 150 | 0.11600  | 0.11061     | 0.11414     | 0.11384     | 0.11158     | 0.11158     | 0.11046 | 0.10717             | 0.11007             | <b>0.10288</b>      | 0.10447             | 0.10857             |
|        | 200 | 0.09298  | 0.08987     | 0.09182     | 0.09168     | 0.09027     | 0.09027     | 0.08979 | 0.08774             | 0.08932             | <b>0.08493</b>      | 0.08581             | 0.08835             |
|        | 250 | 0.06883  | 0.06705     | 0.06823     | 0.06820     | 0.06745     | 0.06745     | 0.06704 | 0.06601             | 0.06697             | <b>0.06528</b>      | 0.06533             | 0.06641             |
|        | 300 | 0.06035  | 0.05887     | 0.05989     | 0.05992     | 0.05930     | 0.05930     | 0.05886 | 0.05804             | 0.05891             | <b>0.05688</b>      | 0.05741             | 0.05855             |
| 0.90   | 400 | 0.03161  | 0.03130     | 0.03147     | 0.03149     | 0.03130     | 0.03130     | 0.03129 | 0.03106             | 0.03120             | <b>0.03078</b>      | 0.03081             | 0.03108             |
|        | 50  | 2.66437  | 1.74926     | 2.19399     | 0.93552     | 1.13348     | 1.13273     | 1.10997 | 0.77478             | 0.97188             | 0.62160             | <b>0.60350</b>      | 0.64683             |
|        | 100 | 0.60710  | 0.47576     | 0.56130     | 0.50960     | 0.48666     | 0.48666     | 0.46390 | 0.37895             | 0.45207             | <b>0.29300</b>      | 0.32086             | 0.39618             |
|        | 150 | 0.14524  | 0.13656     | 0.14243     | 0.14245     | 0.13880     | 0.13880     | 0.13648 | 0.13116             | 0.13638             | <b>0.12061</b>      | 0.12616             | 0.13422             |
|        | 200 | 0.12195  | 0.11608     | 0.12005     | 0.12017     | 0.11759     | 0.11759     | 0.11603 | 0.11237             | 0.11593             | <b>0.10451</b>      | 0.10878             | 0.11435             |
|        | 250 | 0.09396  | 0.09043     | 0.09283     | 0.09293     | 0.09142     | 0.09142     | 0.09040 | 0.08826             | 0.09042             | <b>0.08331</b>      | 0.08605             | 0.08947             |
| 0.95   | 300 | 0.07867  | 0.07624     | 0.07790     | 0.07801     | 0.07697     | 0.07697     | 0.07623 | 0.07475             | 0.07627             | <b>0.07085</b>      | 0.07311             | 0.07564             |
|        | 400 | 0.03925  | 0.03875     | 0.03902     | 0.03907     | 0.03876     | 0.03876     | 0.03873 | 0.03831             | 0.03856             | <b>0.03702</b>      | 0.03765             | 0.03839             |
|        | 50  | 4.72978  | 2.93026     | 3.74124     | 1.04032     | 1.41615     | 1.40702     | 1.39023 | 0.92911             | 1.18079             | 0.78720             | <b>0.70901</b>      | 0.87472             |
|        | 100 | 1.09782  | 0.77195     | 0.98026     | 0.81311     | 0.76408     | 0.76408     | 0.72157 | 0.51989             | 0.68639             | <b>0.40682</b>      | 0.41788             | 0.52998             |
|        | 150 | 0.25753  | 0.23366     | 0.24969     | 0.25000     | 0.23938     | 0.23938     | 0.23332 | 0.21725             | 0.23236             | <b>0.18177</b>      | 0.20040             | 0.22423             |
|        | 200 | 0.21432  | 0.19799     | 0.20910     | 0.20972     | 0.20242     | 0.20242     | 0.19778 | 0.18715             | 0.19768             | <b>0.16043</b>      | 0.17561             | 0.19235             |
| 0.99   | 250 | 0.16015  | 0.15096     | 0.15721     | 0.15758     | 0.15357     | 0.15357     | 0.15088 | 0.14491             | 0.15086             | <b>0.12861</b>      | 0.13796             | 0.14783             |
|        | 300 | 0.13294  | 0.12814     | 0.13090     | 0.13106     | 0.12847     | 0.12847     | 0.12802 | 0.12392             | 0.12655             | <b>0.10967</b>      | 0.11721             | 0.12457             |
|        | 400 | 0.06885  | 0.06706     | 0.06824     | 0.06848     | 0.06755     | 0.06755     | 0.06705 | 0.06583             | 0.06697             | <b>0.06147</b>      | 0.06405             | 0.06646             |
|        | 50  | 22.48028 | 13.40659    | 16.69193    | 1.77338     | 2.19331     | 1.84024     | 1.84010 | 1.37153             | 1.60021             | 1.32157             | <b>1.15034</b>      | 1.68741             |
|        | 100 | 5.12119  | 3.18469     | 4.16418     | 1.44793     | 1.70424     | 1.69572     | 1.68953 | 1.06433             | 1.43571             | 0.94107             | <b>0.79531</b>      | 0.66619             |
|        | 150 | 1.10165  | 0.82688     | 1.00491     | 0.96127     | 0.82800     | 0.82800     | 0.80550 | 0.60217             | 0.75657             | <b>0.44955</b>      | 0.48791             | 0.61113             |
|        | 200 | 0.91484  | 0.75193     | 0.84714     | 0.82063     | 0.72859     | 0.72859     | 0.72765 | 0.59048             | 0.67467             | <b>0.39659</b>      | 0.46014             | 0.57300             |
|        | 250 | 0.72845  | 0.61254     | 0.68496     | 0.67519     | 0.61395     | 0.61395     | 0.60802 | 0.51031             | 0.57736             | <b>0.37172</b>      | 0.42321             | 0.51502             |
|        | 300 | 0.62204  | 0.53360     | 0.58997     | 0.58709     | 0.53950     | 0.53950     | 0.53212 | 0.45830             | 0.51160             | <b>0.33628</b>      | 0.38980             | 0.46643             |
|        | 400 | 0.30257  | 0.27951     | 0.29221     | 0.29447     | 0.27882     | 0.27882     | 0.27842 | 0.25706             | 0.26930             | <b>0.19719</b>      | 0.22411             | 0.25726             |

**Table S5.** Computed MSE for difference estimators  $p = 12$  and  $\beta_0 = 0$ .

| $\rho$ | n   | PMLE    | PRRE        |             |             | PLE         |             | PALE    | PMTPLE              |                     |                     |                     |                     |
|--------|-----|---------|-------------|-------------|-------------|-------------|-------------|---------|---------------------|---------------------|---------------------|---------------------|---------------------|
|        |     |         | $\hat{k}_1$ | $\hat{k}_2$ | $\hat{k}_3$ | $\hat{d}_1$ | $\hat{d}_2$ |         | $\hat{k}_{1,d_0}^*$ | $\hat{k}_{2,d_0}^*$ | $\hat{k}_{3,d_0}^*$ | $\hat{k}_{4,d_0}^*$ | $\hat{k}_{5,d_0}^*$ |
| 0.85   | 50  | 0.65013 | 0.51893     | 0.57315     | 0.55451     | 0.51341     | 0.51341     | 0.50850 | 0.40391             | 0.45233             | <b>0.24582</b>      | 0.24751             | 0.40223             |
|        | 100 | 0.16011 | 0.15121     | 0.15315     | 0.15586     | 0.15156     | 0.15156     | 0.15120 | 0.14300             | 0.14492             | <b>0.10029</b>      | 0.11441             | 0.14358             |
|        | 150 | 0.04204 | 0.04156     | 0.04160     | 0.04190     | 0.04157     | 0.04157     | 0.04156 | 0.04109             | 0.04114             | <b>0.03678</b>      | 0.03889             | 0.04112             |
|        | 200 | 0.03366 | 0.03337     | 0.03339     | 0.03358     | 0.03338     | 0.03338     | 0.03337 | 0.03309             | 0.03311             | <b>0.03038</b>      | 0.03173             | 0.03310             |
|        | 250 | 0.02680 | 0.02662     | 0.02663     | 0.02674     | 0.02662     | 0.02662     | 0.02662 | 0.02645             | 0.02646             | <b>0.02476</b>      | 0.02561             | 0.02646             |
|        | 300 | 0.02231 | 0.02219     | 0.02220     | 0.02228     | 0.02220     | 0.02220     | 0.02219 | 0.02208             | 0.02209             | <b>0.02091</b>      | 0.02151             | 0.02209             |
| 0.90   | 400 | 0.01126 | 0.01122     | 0.01123     | 0.01125     | 0.01123     | 0.01123     | 0.01122 | 0.01119             | 0.01120             | <b>0.01086</b>      | 0.01103             | 0.01120             |
|        | 50  | 0.88547 | 0.66504     | 0.76126     | 0.71804     | 0.64772     | 0.64772     | 0.64168 | 0.47438             | 0.55650             | <b>0.29433</b>      | 0.27789             | 0.46404             |
|        | 100 | 0.21093 | 0.19563     | 0.19939     | 0.20377     | 0.19611     | 0.19611     | 0.19561 | 0.18156             | 0.18526             | <b>0.12176</b>      | 0.13769             | 0.18235             |
|        | 150 | 0.05347 | 0.05268     | 0.05276     | 0.05325     | 0.05270     | 0.05270     | 0.05268 | 0.05192             | 0.05200             | <b>0.04512</b>      | 0.04836             | 0.05196             |
|        | 200 | 0.04423 | 0.04372     | 0.04377     | 0.04409     | 0.04374     | 0.04374     | 0.04372 | 0.04324             | 0.04328             | <b>0.03867</b>      | 0.04093             | 0.04327             |
|        | 250 | 0.03484 | 0.03455     | 0.03457     | 0.03476     | 0.03455     | 0.03455     | 0.03455 | 0.03427             | 0.03429             | <b>0.03152</b>      | 0.03289             | 0.03428             |
| 0.95   | 300 | 0.03013 | 0.02993     | 0.02994     | 0.03008     | 0.02993     | 0.02993     | 0.02993 | 0.02973             | 0.02974             | <b>0.02771</b>      | 0.02874             | 0.02974             |
|        | 400 | 0.01456 | 0.01451     | 0.01451     | 0.01455     | 0.01451     | 0.01451     | 0.01451 | 0.01445             | 0.01446             | <b>0.01386</b>      | 0.01417             | 0.01446             |
|        | 50  | 1.59895 | 1.07097     | 1.31472     | 1.08960     | 0.95268     | 0.95268     | 0.94536 | 0.60937             | 0.78703             | 0.43174             | <b>0.36678</b>      | 0.53616             |
|        | 100 | 0.40857 | 0.35517     | 0.37345     | 0.38288     | 0.35624     | 0.35624     | 0.35496 | 0.30764             | 0.32515             | <b>0.18978</b>      | 0.20451             | 0.30983             |
|        | 150 | 0.09501 | 0.09259     | 0.09291     | 0.09435     | 0.09265     | 0.09265     | 0.09259 | 0.09027             | 0.09059             | <b>0.07267</b>      | 0.08032             | 0.09039             |
|        | 200 | 0.07950 | 0.07792     | 0.07810     | 0.07909     | 0.07796     | 0.07796     | 0.07792 | 0.07640             | 0.07658             | <b>0.06363</b>      | 0.06959             | 0.07648             |
| 0.99   | 250 | 0.05965 | 0.05878     | 0.05887     | 0.05942     | 0.05881     | 0.05881     | 0.05878 | 0.05795             | 0.05803             | <b>0.05047</b>      | 0.05402             | 0.05799             |
|        | 300 | 0.05117 | 0.05056     | 0.05061     | 0.05102     | 0.05057     | 0.05057     | 0.05056 | 0.04997             | 0.05002             | <b>0.04436</b>      | 0.04712             | 0.05000             |
|        | 400 | 0.02455 | 0.02438     | 0.02439     | 0.02451     | 0.02439     | 0.02439     | 0.02438 | 0.02422             | 0.02423             | <b>0.02256</b>      | 0.02341             | 0.02423             |
|        | 50  | 7.58171 | 4.54457     | 5.76385     | 1.59730     | 1.73625     | 1.70375     | 1.70190 | 1.08215             | 1.38320             | <b>0.94982</b>      | <b>0.77433</b>      | 1.10627             |
|        | 100 | 1.79510 | 1.19436     | 1.47956     | 1.30214     | 1.05870     | 1.05870     | 1.05358 | 0.67321             | 0.87890             | 0.51250             | <b>0.42818</b>      | 0.58646             |
|        | 150 | 0.41013 | 0.36619     | 0.38057     | 0.39769     | 0.36693     | 0.36693     | 0.36604 | 0.32603             | 0.33999             | <b>0.20536</b>      | 0.23099             | 0.32772             |
|        | 200 | 0.34572 | 0.31624     | 0.32496     | 0.33806     | 0.31685     | 0.31685     | 0.31621 | 0.28885             | 0.29741             | <b>0.18202</b>      | 0.21463             | 0.29001             |
|        | 250 | 0.25561 | 0.23955     | 0.24352     | 0.25139     | 0.23990     | 0.23990     | 0.23954 | 0.22445             | 0.22838             | <b>0.15471</b>      | 0.17699             | 0.22517             |
|        | 300 | 0.22500 | 0.21318     | 0.21587     | 0.22210     | 0.21345     | 0.21345     | 0.21317 | 0.20199             | 0.20465             | <b>0.14238</b>      | 0.16424             | 0.20255             |
|        | 400 | 0.10593 | 0.10281     | 0.10323     | 0.10534     | 0.10287     | 0.10287     | 0.10281 | 0.09980             | 0.10023             | <b>0.07806</b>      | 0.08720             | 0.09994             |

**Table S6.** Computed MSE for difference estimators  $p = 12$  and  $\beta_0 = 1$ .

| $\rho$ | n   | PMLE    | PRRE        |             |             | PLE         |             | PALE    | PMTPLE              |                     |                     |                     |                     |
|--------|-----|---------|-------------|-------------|-------------|-------------|-------------|---------|---------------------|---------------------|---------------------|---------------------|---------------------|
|        |     |         | $\hat{k}_1$ | $\hat{k}_2$ | $\hat{k}_3$ | $\hat{d}_1$ | $\hat{d}_2$ |         | $\hat{k}_{1,d_0}^*$ | $\hat{k}_{2,d_0}^*$ | $\hat{k}_{3,d_0}^*$ | $\hat{k}_{4,d_0}^*$ | $\hat{k}_{5,d_0}^*$ |
| 0.85   | 50  | 0.22883 | 0.21699     | 0.22180     | 0.22209     | 0.21353     | 0.21353     | 0.21353 | 0.20264             | 0.20717             | <b>0.16207</b>      | 0.17748             | 0.20031             |
|        | 100 | 0.05909 | 0.05837     | 0.05866     | 0.05878     | 0.05819     | 0.05819     | 0.05819 | 0.05750             | 0.05778             | <b>0.05395</b>      | 0.05573             | 0.05748             |
|        | 150 | 0.01535 | 0.01533     | 0.01534     | 0.01535     | 0.01532     | 0.01532     | 0.01532 | 0.01530             | 0.01531             | <b>0.01527</b>      | <b>0.01527</b>      | 0.01530             |
|        | 200 | 0.01226 | 0.01224     | 0.01225     | 0.01226     | 0.01224     | 0.01224     | 0.01224 | 0.01222             | 0.01223             | <b>0.01216</b>      | 0.01219             | 0.01222             |
|        | 250 | 0.00952 | 0.00951     | 0.00952     | 0.00952     | 0.00951     | 0.00951     | 0.00951 | 0.00950             | 0.00951             | <b>0.00948</b>      | <b>0.00948</b>      | 0.00950             |
|        | 300 | 0.00821 | 0.00820     | 0.00821     | 0.00821     | 0.00820     | 0.00820     | 0.00820 | 0.00820             | 0.00820             | <b>0.00818</b>      | <b>0.00818</b>      | 0.00820             |
| 0.90   | 400 | 0.00429 | 0.00429     | 0.00429     | 0.00429     | 0.00429     | 0.00428     | 0.00428 | 0.00426             | 0.00417             | <b>0.0041</b>       | 0.00415             | 0.00426             |
|        | 50  | 0.31579 | 0.29215     | 0.30234     | 0.30261     | 0.28542     | 0.28542     | 0.28542 | 0.26398             | 0.27350             | <b>0.19693</b>      | 0.21936             | 0.25942             |
|        | 100 | 0.07764 | 0.07619     | 0.07677     | 0.07704     | 0.07581     | 0.07581     | 0.07581 | 0.07442             | 0.07498             | <b>0.06714</b>      | 0.07072             | 0.07433             |
|        | 150 | 0.01988 | 0.01982     | 0.01984     | 0.01986     | 0.01980     | 0.01980     | 0.01980 | 0.01974             | 0.01976             | <b>0.01944</b>      | 0.01959             | 0.01976             |
|        | 200 | 0.01664 | 0.01659     | 0.01661     | 0.01663     | 0.01658     | 0.01658     | 0.01658 | 0.01654             | 0.01655             | <b>0.01629</b>      | 0.01642             | 0.01654             |
|        | 250 | 0.01263 | 0.01260     | 0.01261     | 0.01262     | 0.01259     | 0.01259     | 0.01259 | 0.01257             | 0.01258             | <b>0.01245</b>      | 0.01251             | 0.01257             |
| 0.95   | 300 | 0.01090 | 0.01088     | 0.01089     | 0.01089     | 0.01088     | 0.01088     | 0.01088 | 0.01086             | 0.01087             | <b>0.01078</b>      | 0.01082             | 0.01087             |
|        | 400 | 0.00561 | 0.00561     | 0.00561     | 0.00561     | 0.00561     | 0.00561     | 0.00561 | 0.00561             | 0.00561             | <b>0.00559</b>      | 0.00560             | 0.00561             |
|        | 50  | 0.58624 | 0.50448     | 0.54381     | 0.53845     | 0.48216     | 0.48216     | 0.48216 | 0.41302             | 0.44788             | <b>0.27958</b>      | 0.30693             | 0.39538             |
|        | 100 | 0.14473 | 0.13931     | 0.14156     | 0.14250     | 0.13793     | 0.13793     | 0.13793 | 0.13276             | 0.13494             | <b>0.10964</b>      | 0.12001             | 0.13191             |
|        | 150 | 0.03457 | 0.03435     | 0.03443     | 0.03451     | 0.03428     | 0.03428     | 0.03428 | 0.03407             | 0.03415             | <b>0.03275</b>      | 0.03345             | 0.03404             |
|        | 200 | 0.02807 | 0.02793     | 0.02798     | 0.02803     | 0.02788     | 0.02788     | 0.02788 | 0.02775             | 0.02780             | <b>0.02687</b>      | 0.02735             | 0.02773             |
| 0.99   | 250 | 0.02160 | 0.02152     | 0.02155     | 0.02158     | 0.02150     | 0.02150     | 0.02150 | 0.02143             | 0.02145             | <b>0.02095</b>      | 0.02121             | 0.02141             |
|        | 300 | 0.01897 | 0.01891     | 0.01894     | 0.01896     | 0.01890     | 0.01890     | 0.01890 | 0.01884             | 0.01886             | <b>0.01847</b>      | 0.01867             | 0.01884             |
|        | 400 | 0.00923 | 0.00921     | 0.00922     | 0.00922     | 0.00921     | 0.00921     | 0.00921 | 0.00919             | 0.00920             | <b>0.00910</b>      | 0.00915             | 0.00919             |
|        | 50  | 2.78140 | 1.80277     | 2.31243     | 1.77100     | 1.28944     | 1.28917     | 1.28917 | 0.80955             | 1.09105             | 0.62715             | 0.54560             | <b>0.52890</b>      |
|        | 100 | 0.67112 | 0.56318     | 0.61805     | 0.62296     | 0.53731     | 0.53731     | 0.53731 | 0.44784             | 0.49571             | <b>0.30507</b>      | 0.32908             | 0.42634             |
|        | 150 | 0.15643 | 0.15137     | 0.15344     | 0.15521     | 0.14998     | 0.14998     | 0.14998 | 0.14510             | 0.14713             | <b>0.12131</b>      | 0.13266             | 0.14398             |
|        | 200 | 0.12703 | 0.12393     | 0.12517     | 0.12632     | 0.12306     | 0.12306     | 0.12306 | 0.12004             | 0.12125             | <b>0.10365</b>      | 0.11194             | 0.11932             |
|        | 250 | 0.09820 | 0.09642     | 0.09711     | 0.09778     | 0.09591     | 0.09591     | 0.09591 | 0.09418             | 0.09485             | <b>0.08418</b>      | 0.08931             | 0.09375             |
|        | 300 | 0.08420 | 0.08295     | 0.08343     | 0.08392     | 0.08258     | 0.08258     | 0.08258 | 0.08135             | 0.08182             | <b>0.07389</b>      | 0.07782             | 0.08103             |
|        | 400 | 0.04052 | 0.04018     | 0.04031     | 0.04046     | 0.04008     | 0.04008     | 0.04008 | 0.03974             | 0.03987             | <b>0.03753</b>      | 0.03873             | 0.03967             |
